# Supplementary material for: Citizens' smartphones unravel earthquake shaking in urban areas
Source: Research Square preprint supplement (doi:10.21203/rs.3.rs-5886826/v1), 2025-02-10
Supplement: Supplementary file 1 [file a027a850301dd664f268d773.xlsx]

## Sheet: Foglio1
Detail of the seismic events used to generate the amplification map of Fig. 2, to validate the amplification map and to produce the peak ground acceleration (PGA) ShakeMap of Fig. 3
Event ID¹			Hypocentre					Estimation⁴	Validation⁵	PGA⁶
	Date and time (UTC+2)	Mag.	Lat.	Long.	Depth (km)	Smartphones²	Stations³
39254101	18-Jun-2024 01:58:24	3.4	40.83	14.09	2.9				X
39089101	08-Jun-2024 02:09:03	3.7	40.83	14.15	2.6	235	27	X	X
39089291	08-Jun-2024 01:52:21	3	40.83	14.14	1.6				X
39088961	08-Jun-2024 01:52:04	3.5	40.83	14.14	2.2				X
38797691	22-May-2024 06:28:00	3.6	40.81	14.11	2.5	56	29	X	X
38764921	20-May-2024 21:00:55	3.6	40.82	14.12	2.7				X
38762741	20-May-2024 19:55:37	3.1	40.82	14.13	2.5				X
38762031	20-May-2024 19:46:14	3.9	40.83	14.14	2.5	73	27	X	X
38759141	20-May-2024 18:10:03	4.4	40.83	14.14	2.6				X
38759411	20-May-2024 17:51:14	3.5	40.84	14.13	2.8				X
38702441	18-May-2024 04:30:55	3.7	40.84	14.15	2.8				X
38617181	13-May-2024 01:30:20	2.9	40.83	14.09	2.9				X
38580361	10-May-2024 11:26:10	3.6	40.81	14.11	3.7				X
38580291	10-May-2024 11:25:51	3.7	40.8	14.11	2.6				X
38525651	07-May-2024 01:47:54	3.2	40.83	14.14	1.6				X
38381891	27-Apr-2024 03:44:56	3.9	40.81	14.09	3	441	29	X	X
38207461	14-Apr-2024 08:01:43	3	40.83	14.14	2.4				X
38206811	14-Apr-2024 07:46:58	3.1	40.83	14.14	2.8				X
38206821	14-Apr-2024 07:44:24	3.7	40.83	14.14	2.5				X
38104271	04-Apr-2024 05:32:56	3.2	40.82	14.11	2.6				X
37758961	03-Mar-2024 09:01:55	3.4	40.82	14.16	2.9				X
37620831	17-Feb-2024 19:22:09	3	40.84	14.11	3				X
36951941	23-Nov-2023 18:41:46	3.1	40.83	14.14	2.8				X
36499161	16-Oct-2023 10:36:21	3.6	40.83	14.14	1.9				X
36365741	02-Oct-2023 20:08:26	4	40.83	14.15	2.6				X
36299321	27-Sep-2023 01:35:34	4.2	40.82	14.16	2.9	157	14		X	X
36288401	26-Sep-2023 07:10:29	3.2	40.8	14.11	3				X
36243651	22-Sep-2023 09:02:00	3	40.83	14.14	1.4				X
36084091	07-Sep-2023 17:45:28	3.8	40.83	14.15	2.5				X
35871351	18-Aug-2023 04:18:05	3.6	40.83	14.14	2.4				X
35871201	18-Aug-2023 04:09:59	3.1	40.83	14.15	2.3				X
35278141	11-Jun-2023 06:44:25	3.6	40.83	14.11	2.6				X
34919151	08-May-2023 02:28:34	3.4	40.83	14.14	2.7				X
34043501	05-Feb-2023 00:45:36	3	40.8	14.11	4.5				X
¹ The event ID assigned by the Italian National Institute of Geophysics and Volcanology (INGV).
² The number of smartphones of the Earthquake Network citizen science initiative located in the red zone of Campi Flegrei that detected the event.
³ The number of stations of the INGV seismological network located in the red zone of Campi Flegrei that detected the event.
⁴ The "X" identifies the events used to estimate the high-resolution amplification map for the red zone of Campi Flegrei (Fig. 2 in the manuscript).
⁵ The "X" identifies the events used to validate the high-resolution amplification map through the ground motion model detailed in equation (10) in the Method section of the manuscript.
⁶ The "X" identifies the event for which the high-resolution PGA ShakeMap was generated (Fig. 3 in the manuscript).
